# Supplementary material for: Circadian expression of Fabp7 mRNA is disrupted in Bmal1 KO mice
Source: PubMed Central journal article supplement (PMC7041087; doi:10.1186/s13041-020-00568-7), 2020-02-24
Supplement: 13041_2020_568_MOESM1_ESM.pdf [file 13041_2020_568_MOESM1_ESM.pdf]

Figure S1

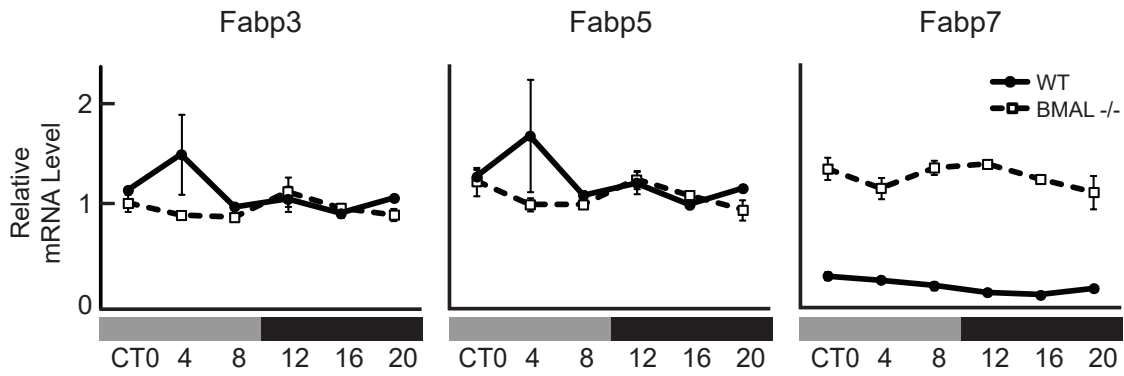

Average expression of Fabp7 mRNA is ~7fold greater in BMAL KO compared to WT, while Fabp3 and Fabp5 are stable. Relative mRNA expression of various Fabps in BMAL KO vs. C57BL/6 WT mice in constant dark conditions. Values represent relative mRNA level to Gapdh as measured by qRT-PCR.
